# Supplementary material for: Development of an Advanced Multicellular Intestinal Model for Assessing Immunomodulatory Properties of Anti-Inflammatory Compounds
Source: PubMed Central journal article supplement (PMC8085553; doi:10.3389/fphar.2021.639716), 2021-04-16
Supplement: datasheet1.pdf [file datasheet1.pdf]

*Supplementary Material*

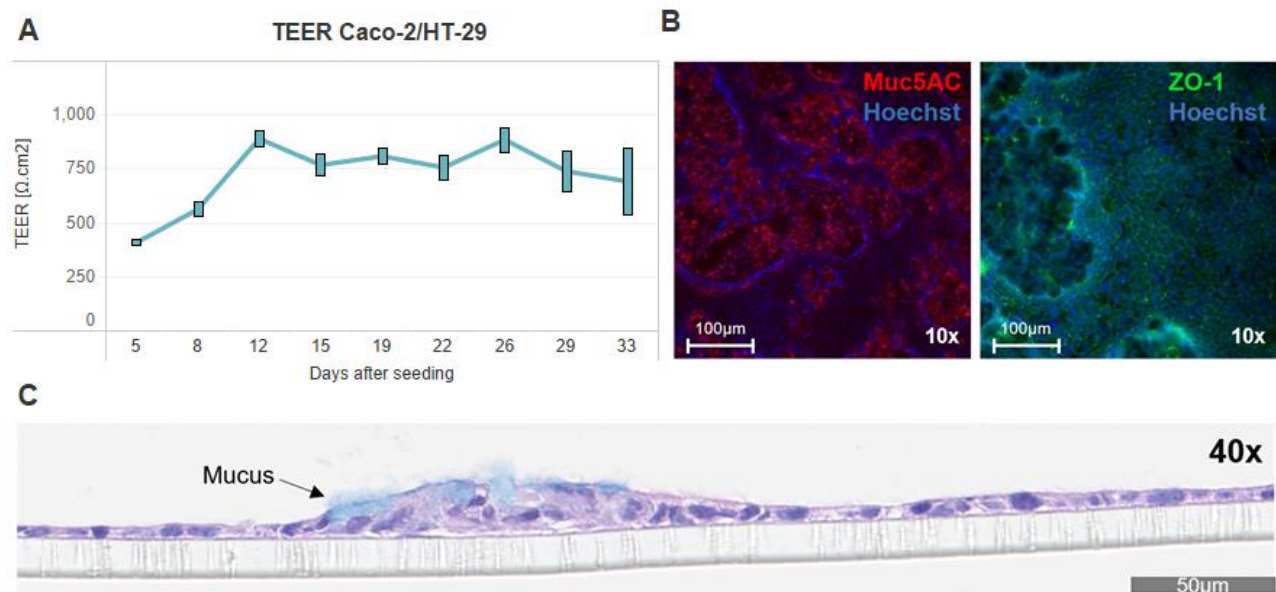

**Supplementary Figure 1.** Caco-2/HT29-MTX coculture differentiation. A) Caco-2/HT29-MTX coculture TEER profile measured from the day 100% cell confluence was reached up to day 32. Average value and corresponding standard deviation obtained from 24 individual trans-wells. (B) Immunofluorescence staining for Muc5AC and ZO-1, both combined with Hoechst, on day 12. C) Representative image of hematoxylin, eosin, and Alcian blue-stained culture sections obtained on day 12. Abbreviations: Muc, mucin; TEER, trans epithelial electrical resistance; ZO, zona occludens.

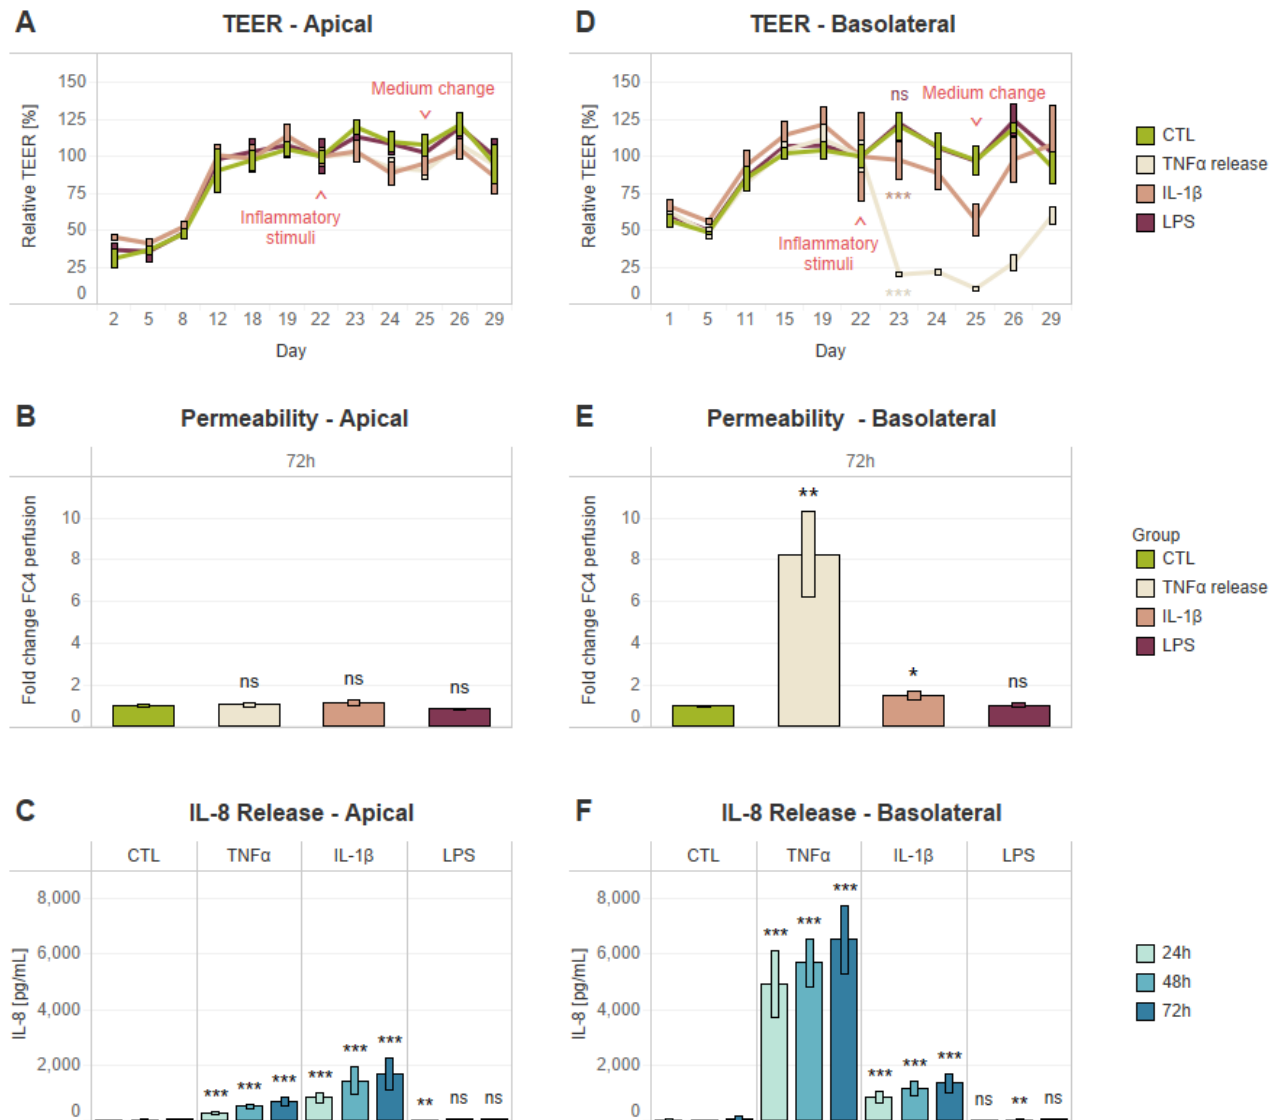

**Supplementary Figure 2.** Optimization of induction of inflammation in Caco-2/HT29 monoculture. TEER (**A** and **D**), permeability (**B** and **E**), and IL-8 release (**C** and **F**) in differentiated Caco-2/HT29 cocultures stimulated apically (**A–C**) or basolaterally (**D–F**) with inflammatory inducers (100 ng/mL TNF $\alpha$ , 100 ng/mL IL-1 $\beta$ , or 50  $\mu$ g/mL LPS) on day 22. The inflammatory stimuli were left up to day 25(72 h) and then washed out. TEER and IL-8 release was assessed at 24, 48 and 72 h after pro-inflammatory stimuli were added while permeability was only assessed after 72 h. TEER values are expressed in percentage; measurements obtained before addition of inflammatory stimuli (day 25) were used as reference (100%). Permeability is represented as fold change over the untreated control. Data are presented as average of 4 individual trans-wells with their corresponding standard deviation. Statistical differences between the control and each of the three treatments were determined by a two-tailed t-test, \* $p \leq 0.05$ ; \*\* $p \leq 0.01$ ; \*\*\* $p \leq 0.001$ ; ns,  $p > 0.05$ . Abbreviations: LPS, lipopolysaccharide; TEER, trans epithelial electrical resistance; TNF, tumor necrosis factor; IL, interleukin; CTL, control.

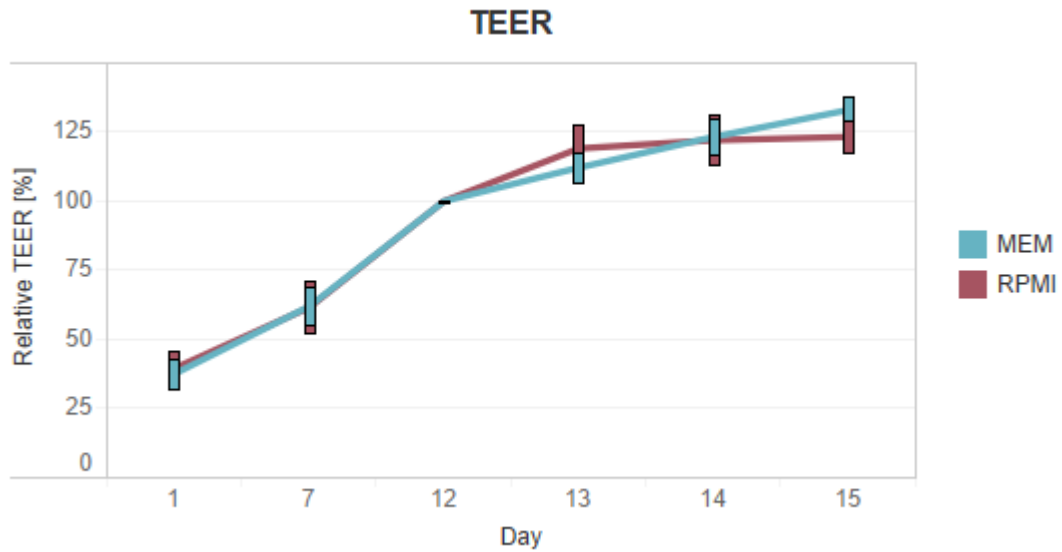

**Supplementary Figure 3.** Caco-2/HT29-MTX coculture medium compatibility. TEER measurement in Caco-2/HT29-MTX coculture switched to THP-1 medium (RPMI) for 72 h on day 12. CTL was maintained in regular coculture medium (MEM). TEER is expressed as relative percentage, with the value on day 12 used as reference (100%). Data are presented as average of 12 individual trans-wells with their corresponding standard deviation. Abbreviations: TEER, trans epithelial electrical resistance.

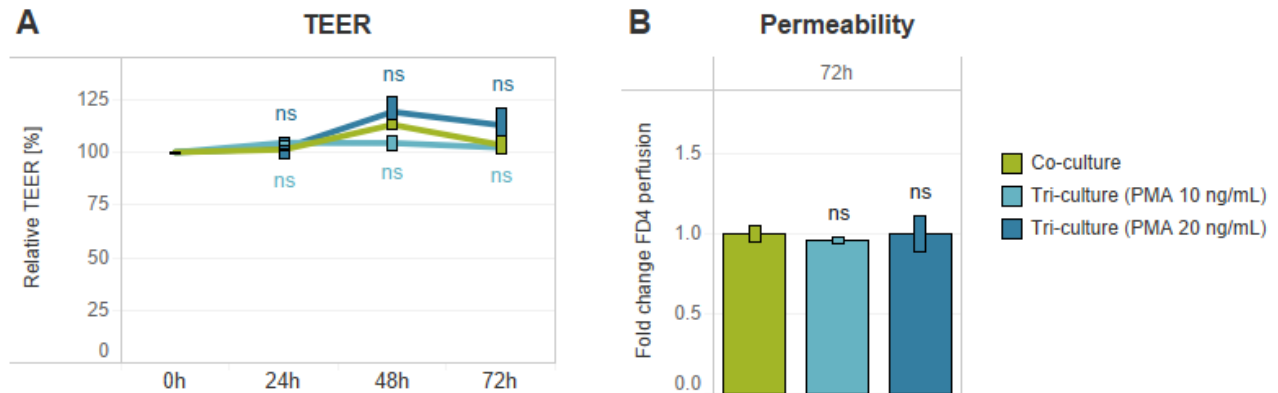

**Supplementary Figure 4.** Caco-2/HT29-MTX/THP-1 triculture assembly. **(A)** TEER measurement in Caco-2/HT29-MTX coculture was measured every day up to 72 h after triculture assembly. TEER is expressed as relative percentage, with the value on the time of assembly (0h) used as reference (100%). **(B)** Permeability assessed 72 h after triculture assembly. Permeability is represented as fold change over Caco-2/HT29-MTX coculture. Data are presented as average of 2 individual trans-wells with their corresponding standard deviation. Statistical differences between the PMA-treated tri-culture and the co-culture were determined by a two-tailed t-test, \* $p \leq 0.05$ ; \*\* $p \leq 0.01$ ; \*\*\* $p \leq 0.001$ ; ns,  $p > 0.05$ . Abbreviations: PMA, phorbol-12-myristate-13-acetate; TEER, trans epithelial electrical resistance.

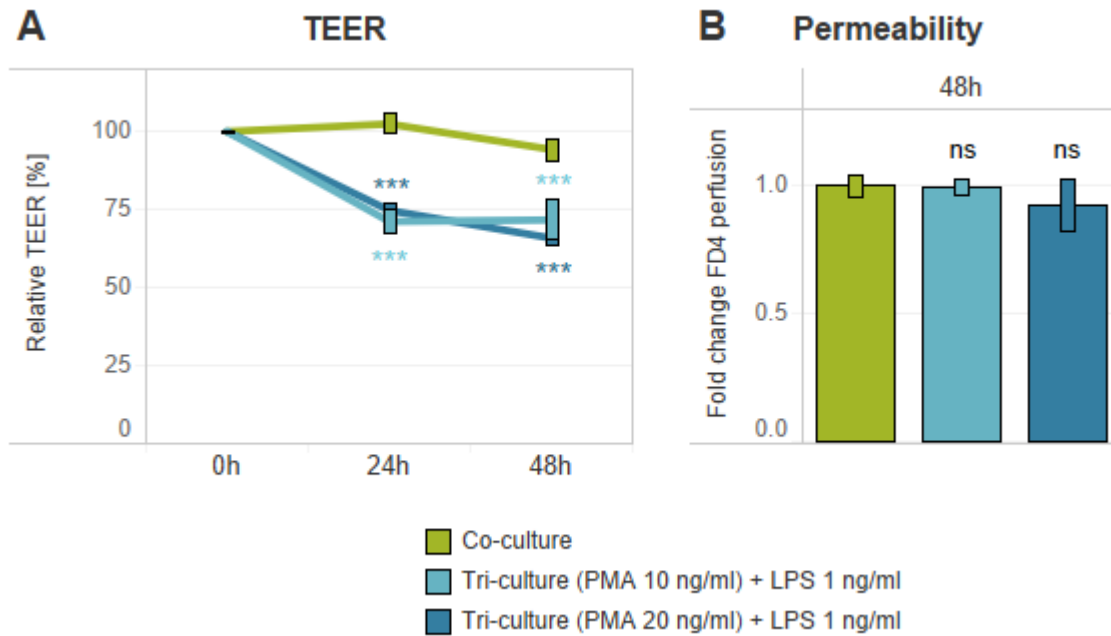

**Supplementary Figure 5.** Effect of pro-inflammatory stimulation on triculture. Pro-inflammatory effect of 10 ng/mL LPS added basolaterally on  $12 \times 10^4$  THP-1 containing triculture with a volume of 600  $\mu$ L of cell culture media in the basolateral compartment. **(A)** TEER, **(B)** membrane permeability, and **(C)** IL-8 release of the triculture. Different PMA concentrations (10 and 20 ng/mL) were tested for optimizing the triculture response. TEER values are represented in percentage; zero-hour treatment was used as reference (100%). Permeability is expressed as fold change over the untreated control. Data are presented as the average of two technical replicates with corresponding standard deviation. Statistical differences between the LPS- and PMA-treated culture and the co-culture without them were determined by a two-tailed t-test, \* $p \leq 0.05$ ; \*\* $p \leq 0.01$ ; \*\*\* $p \leq 0.001$ ; ns,  $p > 0.05$ . Abbreviations: PMA, phorbol 12-myristate; TNF, tumor necrosis factor.

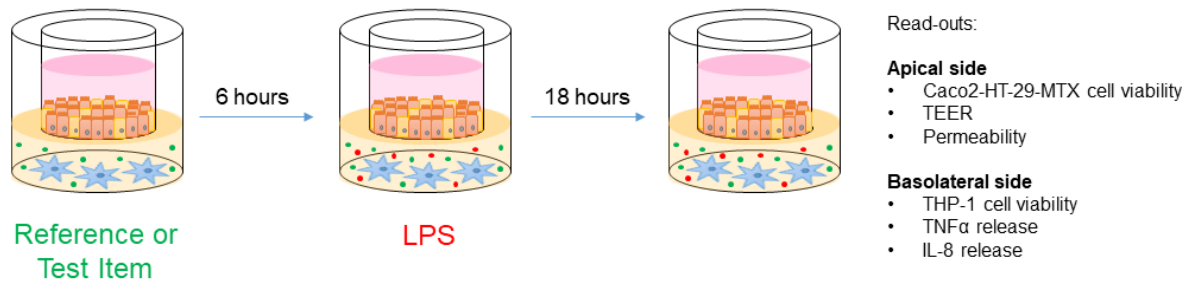

**Supplementary Figure 6.** Schematic representation of the anti-inflammatory screening protocol. Reference or test items are preincubated in the basolateral compartment for 6 h before the pro-inflammatory stimulus (LPS) is added to the same compartment. After an additional 18 h of coincubation, the indicated readouts are obtained. Abbreviations: LPS, lipopolysaccharide.

**Supplementary Table 1. Equivalence comparison between 21 and 14 day protocol (figure 1).**

Symbols and abbreviations: \*\*\*:  $p \leq 0.001$ ; ns:  $p > 0.05$ .

| Panel | Endpoint     | 21 vs 14 |          |           | Epsilon |
|-------|--------------|----------|----------|-----------|---------|
|       |              | 5 mg/ml  | 25 mg/ml | 100 mg/ml |         |
| A & B | TEER         | ***      | ***      | ***       | 20%     |
| C     | Permeability | ***      | ***      | ***       | 20%     |
| D     | IL-8 apical  | n.s.     | n.s.     | n.s.      | 20%     |
| E     | IL-8 basal   | n.s.     | n.s.     | n.s.      | 20%     |

**Supplementary Table 2. Linear regression TEER recovery (figure 1).**

Symbols and abbreviations: \*\*\*:  $p \leq 0.001$

| Panel | Endpoint | 5 mg/ml | 25 mg/ml | 100 mg/ml |
|-------|----------|---------|----------|-----------|
| A     | TEER     | ***     | ***      | ***       |
| B     | TEER     | ***     | ***      | ***       |

**Supplementary Table 3. Equivalence comparison between 24 h and 48 h resting time protocol (figure 2).**

Abbreviations: n.s., not significant, n.c., not computable

| Panel | Endpoint     | 24 h vs 48 h    |                 |                 | Epsilon |
|-------|--------------|-----------------|-----------------|-----------------|---------|
|       |              | PMA<br>10 ng/ml | PMA<br>20 ng/ml | PMA<br>40 ng/ml |         |
| A     | IL-8         | n.c.            | n.c.            | n.s.            | 20%     |
| B     | TNF $\alpha$ | n.s.            | n.s.            | n.s.            | 20%     |
| C     | IL-8         | n.s.            | n.s.            | n.s.            | 20%     |
| D     | TNF $\alpha$ | n.s.            | n.s.            | n.s.            | 20%     |

**Supplementary Table 4. Linear regression PMA concentration (figure 2).**

Symbols and abbreviations: \*\*\*:  $p \leq 0.001$

| Panel | Endpoint | PMA |
|-------|----------|-----|
| A     | IL-8     | *** |
| B     | IL-8     | *** |

**Supplementary Table 5.** Product information of reference compounds, test compounds, and pro-inflammatory inducers

|                     | <b>Short name</b>        | <b>Manufacturer (Cat #)</b> | <b>CAS number</b> |
|---------------------|--------------------------|-----------------------------|-------------------|
| Reference compounds | Budesonide               | Sigma B7777                 | 51333-22-3        |
|                     | TPCA-1                   | Tocris                      | 507475-17-4       |
|                     | Nicotine                 | Sigma N3876-100mL           | 54-11-5           |
| Test compounds      | ( <i>R/S</i> )-Anatabine | Concept Life Sciences       | 2022507           |
|                     | ( <i>S</i> )-Anatabine   | Peakdale Molecular Ltd      | 2022509           |
| Inducers            | TNF $\alpha$             | R&D Systems (210-TA)        | NA                |
|                     | IL-1 $\beta$             | R&D Systems (201-LB)        | NA                |
|                     | LPS                      | Sigma (L2630)               | NA                |
